# Supplementary material
Source: PubMed Central journal article supplement (PMC4633967)
Supplement: cir-132-1805-s002.pdf [file cir-132-1805-s002.pdf]

## SUPPLEMENTAL MATERIAL

### Supplemental Methods

#### Case Ascertainment: hot and cold pursuit methodology

Hot pursuit was based on the daily assessment of all patients with a possible vascular event identified by: 1) Daily searches of Emergency Department admission and symptom/diagnosis registers; 2) Daily listing from the central admissions department of all patients from our general practices admitted to hospital, and assessment of these patients in hospital; 3) Daily visits to the cardiac surgery and vascular surgery wards and review of daily lists of all patients referred to vascular surgery; 4) Daily identification via Bereavement Officers of patients dead on arrival at hospital or who died soon after; 5) Daily assessment of all patients undergoing diagnostic angiographic, angioplasty/stenting or arterial surgical procedures in any territory.

The methods of cold pursuit were: 1) Weekly review of all listed surgical procedures undertaken by vascular and cardiovascular surgery; 2) Frequent contact with general practices and monthly searches of computerised practice diagnostic codes; 3) Monthly practice-specific list of all patients with relevant diagnostic codes from the coding departments covering all acute and community hospitals (Hospital Episode Statistics – HES – data); 4) Monthly visits to the Coroner's Office to review out-of-hospital deaths; 5) Review of all death certificates and relevant clinical details in the study practices; 6) Practice-specific listings of all ICD-10 death codes from the local Department of Public Health; 7) Review of vascular surgery outpatient clinic letters to identify patients who were not admitted to hospital. For all cases not initially identified by HES data and death certification, these data sources were re-searched using NHS number and other identifiers, where possible.

**Supplemental table 1: Outcome analysis of the 91 largest blood pressure lowering treatment trials**

**SUMMARY OF MAJOR OUTCOMES ASSESSED**

|                | <b>Any Stroke</b> | <b>Non-Fatal Stroke</b> | <b>Fatal Stroke</b> | <b>Any MI</b> | <b>Non-Fatal MI</b> | <b>Fatal MI</b> | <b>Peripheral Vascular Event</b> | <b>Coronary Revascularisation</b> | <b>Cardiovascular Mortality</b> | <b>All-cause Mortality</b> |
|----------------|-------------------|-------------------------|---------------------|---------------|---------------------|-----------------|----------------------------------|-----------------------------------|---------------------------------|----------------------------|
| <b>Total N</b> | 73                | 30                      | 29                  | 79            | 39                  | 37              | 11                               | 26                                | 54                              | 68                         |
| <b>Total %</b> | 80.2              | 33.0                    | 31.9                | 86.8          | 42.9                | 40.7            | 12.1                             | 28.6                              | 59.3                            | 74.7                       |

**DETAILED ANALYSIS**

| <b>STUDY DETAILS</b> |                                 |                   |                           | <b>MAJOR OUTCOMES ASSESSED</b> |                   |                         |                     |               |                     |                 |                                  |                         |                      |                            |
|----------------------|---------------------------------|-------------------|---------------------------|--------------------------------|-------------------|-------------------------|---------------------|---------------|---------------------|-----------------|----------------------------------|-------------------------|----------------------|----------------------------|
| <b>Study</b>         | <b>Placebo/Reference Drug</b>   | <b>N Ref. Arm</b> | <b>Experimental Drug</b>  | <b>N Exp. Arm</b>              | <b>Any Stroke</b> | <b>Non-Fatal Stroke</b> | <b>Fatal Stroke</b> | <b>Any MI</b> | <b>Non-Fatal MI</b> | <b>Fatal MI</b> | <b>Peripheral Vascular Event</b> | <b>Coronary Revasc.</b> | <b>CVS Mortality</b> | <b>All-cause Mortality</b> |
| AASK                 | Metoprolol                      | 441               | Ramipril                  | 436                            | NO                | NO                      | NO                  | NO            | NO                  | NO              | NO                               | NO                      | YES                  | YES                        |
| ABCD (H)             | Enalapril                       | 235               | Nisoldipine               | 235                            | YES               | NO                      | NO                  | YES           | YES                 | YES             | NO                               | NO                      | YES                  | YES                        |
| ACCOMPLISH           | Benazepril+Am                   | 5744              | Benazepril+HCTZ           | 5762                           | YES               | NO                      | NO                  | YES           | NO                  | NO              | NO                               | YES                     | YES                  | YES                        |
| ACTION               | lodipine                        |                   | Placebo                   | 3840                           | YES               | NO                      | NO                  | YES           | NO                  | NO              | YES                              | YES                     | YES                  | YES                        |
| ADVANCE              | Placebo                         | 5571              | Nifedipine                | 3825                           | YES               | NO                      | NO                  | YES           | NO                  | NO              | NO                               | NO                      | YES                  | YES                        |
| ALLHAT I             | Chlortalidone                   | 15268             | Perindopril-indapamide    | 5569                           | YES               | NO                      | NO                  | YES           | NO                  | NO              | NO                               | NO                      | YES                  | YES                        |
| ALLHAT II            | Chlortalidone                   | 15268             | Doxazosin                 | 9067                           | YES               | NO                      | NO                  | YES           | NO                  | NO              | YES                              | YES                     | YES                  | YES                        |
| ANBP2                | Hydrochlorothiazide             | 3039              | Doxazosin                 | 9067                           | YES               | NO                      | NO                  | YES           | NO                  | NO              | YES                              | YES                     | YES                  | YES                        |
| ANBPS                | Placebo                         | 1706              | Enalapril                 | 3044                           | YES               | YES                     | YES                 | YES           | YES                 | YES             | NO                               | NO                      | NO                   | YES                        |
| APSYS                | Metoprolol                      | 406               | Chlorothiazide            | 1721                           | YES               | YES                     | YES                 | YES           | YES                 | YES             | NO                               | NO                      | YES                  | YES                        |
| ASCOT                | Metoprolol                      | 406               | Verapamil                 | 403                            | YES               | YES                     | NO                  | YES           | YES                 | YES             | YES                              | YES                     | YES                  | YES                        |
| AVER                 | Atenolol-based                  | 9618              | Amlodipine-based          | 9639                           | YES               | NO                      | NO                  | YES           | NO                  | NO              | YES                              | NO                      | YES                  | YES                        |
| BBB                  | Amlodipine                      | 132               | Enalapril                 | 131                            | NO                | NO                      | NO                  | NO            | NO                  | NO              | NO                               | NO                      | NO                   | NO                         |
| BCAPS                | Conventional treatment          | 1063              | Intense treatment         | 1063                           | YES               | NO                      | NO                  | YES           | YES                 | YES             | NO                               | NO                      | NO                   | NO                         |
| BENEDICT (ACEI)      | Placebo                         | 397               | Metoprolol                | 396                            | YES               | YES                     | YES                 | YES           | YES                 | NO              | NO                               | NO                      | NO                   | NO                         |
| CAMELOT (ACEI)       | Placebo                         | 300               | Trandalopril              | 301                            | NO                | NO                      | NO                  | YES           | NO                  | YES             | NO                               | NO                      | YES                  | NO                         |
| CAPPP                | Placebo                         | 655               | Enalapril                 | 673                            | YES               | NO                      | NO                  | YES           | YES                 | YES             | YES                              | YES                     | YES                  | YES                        |
| CONVINCE             | Diuretic or $\beta$ -Blocker    | 5493              | Captopril                 | 5492                           | YES               | YES                     | YES                 | YES           | YES                 | YES             | NO                               | NO                      | YES                  | NO                         |
| Coope                | Hydrochlorothiazide or atenolol | 8297              | COER Verapamil            | 8179                           | YES               | NO                      | NO                  | YES           | NO                  | NO              | NO                               | YES                     | YES                  | YES                        |
|                      | Control (no treatment)          | 465               | Atenolol or bendrofluzide | 419                            | YES               | YES                     | YES                 | YES           | YES                 | YES             | NO                               | NO                      | YES                  | YES                        |

|                   |                                 |       |                                   |       |     |     |     |     |     |     |    |     |     |     |
|-------------------|---------------------------------|-------|-----------------------------------|-------|-----|-----|-----|-----|-----|-----|----|-----|-----|-----|
| DETAIL            | Enalapril                       | 130   | Telmisartan                       | 120   | NO  | NO  | NO  | YES | YES | NO  | NO | NO  | YES | YES |
| DIABHYCAR         | Placebo                         | 2469  | Ramipril                          | 2443  | YES | YES | YES | YES | YES | YES | NO | NO  | YES | YES |
| DREAM             | Placebo                         | 2646  | Ramipril                          | 2623  | YES | NO  | NO  | YES | NO  | NO  | NO | YES | YES | YES |
| Dutch-TIA         | Placebo                         | 741   | Atenolol                          | 732   | YES | YES | YES | YES | YES | YES | NO | NO  | NO  | YES |
| E-COST            | Conventional treatment          | 995   | Candesartan                       | 1053  | YES | NO  | NO  | YES | NO  | NO  | NO | NO  | NO  | NO  |
| ELSA              | Atenolol                        | 1012  | Lacidipine                        | 1023  | YES | NO  | NO  | YES | NO  | NO  | NO | NO  | YES | YES |
| ESPIRAL           | Fosinopril                      | 129   | Nifedipine                        | 112   | YES | NO  | NO  | YES | NO  | NO  | NO | NO  | NO  | YES |
| EUCLID            | Placebo                         | 265   | Lisinopril                        | 265   | NO  | NO  | NO  | NO  | NO  | NO  | NO | NO  | NO  | NO  |
| EUROPA            | Placebo                         | 6108  | Perindopril                       | 6110  | YES | NO  | NO  | YES | NO  | NO  | NO | NO  | YES | YES |
| EWPHE             | Placebo                         | 424   | Hydrochlorothiazide + Triamterene | 416   | YES | YES | YES | YES | YES | YES | NO | NO  | YES | YES |
| FACET             | Fosinopril                      | 189   | Amlodipine                        | 191   | YES | NO  | NO  | YES | NO  | NO  | NO | YES | NO  | YES |
| FEVER             | Placebo                         | 4870  | Felodipine                        | 4841  | YES | YES | YES | YES | NO  | NO  | NO | YES | YES | YES |
| FOSIDAL           | Placebo                         | 201   | Fosinopril                        | 196   | NO  | NO  | NO  | NO  | NO  | NO  | NO | NO  | NO  | NO  |
| HAPPY             | Thiazide Conventional treatment | 3272  | β-Blocker                         | 3297  | YES | YES | YES | YES | YES | YES | NO | NO  | NO  | YES |
| HDFP              | Intense treatment               | 5455  | Intense treatment                 | 5485  | YES | NO  | NO  | YES | NO  | NO  | NO | NO  | NO  | YES |
| Himmelmann        | Atenolol                        | 129   | Cilazapril                        | 131   | NO  | NO  | NO  | NO  | NO  | NO  | NO | NO  | NO  | NO  |
| HOPE              | Placebo                         | 4652  | Ramipril                          | 4645  | YES | NO  | NO  | YES | NO  | NO  | NO | YES | YES | YES |
| HOT               | Target<90                       | 6264  | Target<85                         | 6264  | YES | NO  | NO  | YES | NO  | NO  | NO | NO  | YES | YES |
| HSCSG             | Placebo                         | 219   | Deserpidine and Methylclothiazide | 233   | YES | NO  | NO  | YES | NO  | NO  | NO | NO  | NO  | YES |
| HYVET             | Placebo                         | 1912  | Active treatment                  | 1933  | YES | YES | YES | YES | NO  | NO  | NO | NO  | YES | YES |
| IDNT (ATII)       | Placebo                         | 569   | Irbesartan                        | 579   | NO  | NO  | NO  | NO  | NO  | NO  | NO | NO  | NO  | YES |
| INSIGHT           | Co-amilozide                    | 3164  | Nifedipine                        | 3157  | YES | YES | YES | YES | YES | YES | NO | NO  | YES | YES |
| INTACT            | Placebo                         | 131   | Nifedipine                        | 119   | NO  | NO  | NO  | NO  | NO  | NO  | NO | NO  | NO  | NO  |
| INVEST            | Non-Calcium antagonist          | 11309 | Calcium antagonist                | 11267 | YES | YES | YES | YES | YES | NO  | NO | YES | YES | YES |
| IPPPSH            | Non-bBlocker                    | 3172  | β-Blocker                         | 3185  | YES | YES | YES | YES | YES | YES | NO | NO  | YES | YES |
| IRMA2 (ATII150mg) | Placebo                         | 201   | Irbesartan 150mg                  | 195   | NO  | NO  | NO  | NO  | NO  | NO  | NO | NO  | NO  | NO  |
| JMIC-B            | ACE Inhibitor                   | 822   | Nifedipine                        | 828   | YES | NO  | NO  | YES | NO  | NO  | NO | YES | NO  | YES |
| J-MIND            | Nifedipine                      | 228   | Enalapril                         | 208   | YES | NO  | NO  | YES | NO  | NO  | NO | NO  | NO  | NO  |
| Kondo             | Baseline treatment              | 201   | Candesartan+Baseline treatment    | 194   | NO  | NO  | NO  | YES | YES | YES | NO | YES | YES | YES |
| LAARS             | Atenolol                        | 138   | Losartan                          | 142   | NO  | NO  | NO  | NO  | NO  | NO  | NO | NO  | NO  | NO  |
| LIFE              | Atenolol                        | 4588  | Losartan                          | 4605  | YES | NO  | NO  | YES | NO  | NO  | NO | YES | YES | YES |
| Maschio           | Placebo                         | 283   | Benazepril                        | 300   | YES | NO  | NO  | YES | YES | YES | NO | NO  | NO  | NO  |
| MIDAS             | Hydrochlorothiazide             | 441   | Isradipine                        | 442   | YES | NO  | NO  | YES | NO  | NO  | NO | YES | NO  | YES |
| MOSES             | Eposartan                       | 681   | Nitrendipine                      | 671   | YES | NO  | NO  | YES | NO  | NO  | NO | NO  | NO  | YES |
| MRC1              | Placebo                         | 8654  | Bendrofluazide                    | 4297  | YES | YES | YES | YES | YES | YES | NO | NO  | YES | YES |
| MRC2              | Placebo                         | 2213  | Bendrofluazide                    | 1081  | YES | NO  | YES | YES | NO  | YES | NO | NO  | YES | YES |

|                         |                                    |      |                                          |         |     |     |     |     |     |     |     |     |     |     |
|-------------------------|------------------------------------|------|------------------------------------------|---------|-----|-----|-----|-----|-----|-----|-----|-----|-----|-----|
| NICOLE                  | Placebo                            | 338  | Nisoldipine                              | 308     | YES | NO  | NO  | YES | NO  | NO  | NO  | YES | NO  | YES |
| NICS                    | Trichlormethiazide                 | 210  | Nicardipine (SR)                         | 204     | YES | YES | YES | YES | NO  | NO  | NO  | NO  | NO  | NO  |
| NORDIL                  | Diuretic and/or                    | 5471 | Diltiazem (SR)                           | 5410    | YES | YES | YES | YES | YES | YES | NO  | NO  | YES | YES |
| ONTARGET<br>(ACEI+ATII) | $\beta$ -Blocker                   | 8576 | Ramipril +<br>Telmisartan                | 8502.00 | YES | NO  | NO  | YES | NO  | NO  | NO  | NO  | YES | YES |
| OSLO Study              | Ramipril                           | 379  | Hydrochlorothiazide                      | 406     | YES | NO  | NO  | YES | NO  | NO  | NO  | YES | YES | YES |
| PART2                   | Control (no treatment)             | 309  | Ramipril                                 | 308     | YES | YES | NO  | YES | YES | YES | NO  | NO  | YES | YES |
| PATS                    | Placebo                            | 2824 | Indapamide                               | 2841    | YES | YES | YES | YES | YES | YES | NO  | NO  | YES | YES |
| PEACE                   | Placebo                            | 4132 | Trandolopril                             | 4158    | YES | NO  | NO  | YES | YES | YES | NO  | YES | YES | YES |
| PHYLLIS                 | Hydrochlorothiazide                | 127  | +Pravastatin                             | 126     | NO  | NO  | NO  | YES | NO  | NO  | NO  | NO  | NO  | NO  |
| PREVEND IT              | Combination                        | 433  | Fosinopril                               | 431     | YES | NO  | NO  | YES | YES | YES | YES | NO  | YES | NO  |
| PREVENT                 | Placebo                            | 408  | Amlodipine                               | 417     | YES | NO  | NO  | YES | NO  | NO  | NO  | YES | NO  | YES |
| PROFESS                 | Telmisartan                        | 9825 | Placebo                                  | 9856    | YES | NO  | NO  | YES | NO  | NO  | NO  | NO  | YES | YES |
| PROGRESS                | Placebo                            | 3054 | Treatment                                | 3051    | YES | YES | YES | YES | YES | YES | NO  | NO  | YES | YES |
| QUIET                   | Placebo                            | 872  | Quinapril                                | 878     | YES | NO  | NO  | YES | YES | YES | NO  | YES | YES | NO  |
| RENAAL                  | Placebo                            | 762  | Losartan                                 | 751     | NO  | NO  | NO  | YES | NO  | NO  | NO  | NO  | NO  | YES |
| SCAT                    | Placebo                            | 231  | Enalapril                                | 229     | YES | NO  | NO  | YES | YES | YES | NO  | YES | YES | YES |
| SCOPE                   | Placebo                            | 2460 | Candesartan                              | 2477    | YES | YES | YES | YES | YES | YES | NO  | NO  | YES | YES |
| SHELL                   | Chlortalidone                      | 940  | Lacidipine                               | 942     | YES | NO  | NO  | YES | NO  | NO  | NO  | YES | NO  | YES |
| SHEP                    | Placebo                            | 2371 | Chlortalidone                            | 2365    | YES | YES | YES | YES | YES | YES | NO  | YES | YES | YES |
| STONE                   | Placebo                            | 815  | Nifedipine                               | 817     | YES | NO  | NO  | YES | NO  | NO  | NO  | NO  | YES | YES |
| STOPI                   | B-Blocker and/or                   | 815  | Diuretic                                 | 812     | YES | NO  | NO  | YES | NO  | NO  | NO  | NO  | YES | YES |
| STOP2                   | Diuretic, $\beta$ -Blocker or both | 2213 | ACE Inhibitors                           | 2205    | YES | YES | YES | YES | YES | YES | NO  | NO  | YES | YES |
| Syst-China              | Placebo                            | 1141 | Nitrendipine                             | 1253    | YES | YES | YES | YES | YES | YES | NO  | NO  | YES | YES |
| Syst-Eur                | Placebo                            | 2297 | Nitrendipine                             | 2398    | YES | NO  | YES | YES |
| TEST                    | Placebo                            | 348  | Atenolol                                 | 372     | YES | YES | YES | YES | YES | YES | NO  | NO  | YES | YES |
| TIBET                   | Atenolol                           | 226  | Nifedipine                               | 232     | NO  | NO  | NO  | YES | YES | NO  | NO  | YES | NO  | NO  |
| TOMHS                   | Placebo                            | 234  | Acebutolol                               | 132     | NO  |
| TRANSCEND               | Telmisartan                        | 2954 | Placebo                                  | 2972    | YES | NO  | NO  | YES | NO  | NO  | NO  | YES | NO  | YES |
| UKPDS38                 | Less intense                       | 390  | Intense treatment                        | 758     | YES | NO  | NO  | YES | NO  | NO  | YES | NO  | NO  | YES |
| UKPDS39                 | Atenolol                           | 358  | Captopril                                | 400     | YES | NO  | NO  | YES |
| USPHS                   | Placebo                            | 178  | Chlorothiazide +<br>Rauwolfia serpentina | 175     | YES | NO  | NO  | YES | YES | YES | NO  | NO  | YES | YES |
| VACS1                   | Placebo                            | 194  | Active treatment                         | 186     | NO  |
| VACS2                   | Placebo                            | 186  | Hydrochlorothiazide                      | 188     | NO  |
| VALUE                   | Valsartan                          | 7649 | Amlodipine                               | 7596    | YES | NO  | NO  | YES | NO  | NO  | NO  | NO  | YES | YES |
| VHAS                    | Chlortalidone                      | 707  | Verapamil (SR)                           | 707     | YES | NO  | YES | YES |
| Yurenev                 | No $\beta$ -Blocker                | 154  | $\beta$ -Blocker                         | 150     | YES | NO  | NO  | YES | NO  | NO  | NO  | NO  | NO  | NO  |

Supplemental table 2: Age- and sex-specific rates per hundred thousand population (2002-2012) for incident acute peripheral arterial events for acute visceral ischaemia; acute limb ischaemia; and critical limb ischaemia

### Acute Visceral Ischaemia

| AGE (yrs)             | <45     | 45-54    | 55-64    | 65-74     | 75-84      | ≥85           | Total     |
|-----------------------|---------|----------|----------|-----------|------------|---------------|-----------|
| <b>Men</b>            |         |          |          |           |            |               |           |
| Cases                 | 3       | 1        | 4        | 3         | 7          | 10            | 28        |
| Rate/100,000 (95% CI) | 1 (0,3) | 2 (0,9)  | 8 (2,20) | 9 (2,25)  | 34 (14,70) | 193 (93,355)  | 6 (4,9)   |
| <b>Women</b>          |         |          |          |           |            |               |           |
| Cases                 | 0       | 1        | 1        | 8         | 13         | 27            | 50        |
| Rate/100,000 (95% CI) | --      | 2 (0,10) | 2 (0,11) | 22 (9,43) | 49 (26,84) | 245 (161,356) | 11 (8,15) |
| <b>Total</b>          |         |          |          |           |            |               |           |
| Cases                 | 3       | 2        | 5        | 11        | 20         | 37            | 78        |
| Rate/100,000 (95% CI) | 1 (0,2) | 2 (0,6)  | 5 (2,11) | 15 (8,28) | 43 (26,66) | 228 (161,315) | 8 (7,11)  |

### Acute Limb Ischaemia

| AGE (yrs)             | <45 | 45-54    | 55-64     | 65-74      | 75-84       | ≥85          | Total     |
|-----------------------|-----|----------|-----------|------------|-------------|--------------|-----------|
| <b>Men</b>            |     |          |           |            |             |              |           |
| Cases                 | 0   | 4        | 7         | 13         | 19          | 6            | 49        |
| Rate/100,000 (95% CI) | --  | 6 (2,17) | 13 (5,28) | 37 (20,64) | 93 (56,145) | 116 (43,252) | 10 (8,14) |
| <b>Women</b>          |     |          |           |            |             |              |           |
| Cases                 | 0   | 1        | 6         | 8          | 13          | 16           | 44        |
| Rate/100,000 (95% CI) | --  | 2 (0,10) | 12 (4,26) | 22 (9,43)  | 49 (26,84)  | 145 (83,236) | 10 (7,13) |
| <b>Total</b>          |     |          |           |            |             |              |           |
| Cases                 | 0   | 5        | 13        | 21         | 32          | 22           | 93        |
| Rate/100,000 (95% CI) | --  | 4 (1,10) | 13 (7,22) | 29 (18,45) | 68 (47,96)  | 136 (85,206) | 10 (8,12) |

### Critical Limb Ischaemia

| AGE (yrs)             | <45     | 45-54    | 55-64      | 65-74       | 75-84         | ≥85           | Total      |
|-----------------------|---------|----------|------------|-------------|---------------|---------------|------------|
| <b>Men</b>            |         |          |            |             |               |               |            |
| Cases                 | 0       | 5        | 22         | 33          | 33            | 16            | 109        |
| Rate/100,000 (95% CI) | --      | 8 (3,19) | 42 (27,64) | 95 (65,133) | 161 (111,226) | 309 (177,502) | 23 (19,28) |
| <b>Women</b>          |         |          |            |             |               |               |            |
| Cases                 | 1       | 2        | 10         | 19          | 38            | 23            | 93         |
| Rate/100,000 (95% CI) | 0 (0,2) | 3 (0,12) | 20 (10,37) | 52 (31,81)  | 143 (101,197) | 209 (132,313) | 21 (17,25) |
| <b>Total</b>          |         |          |            |             |               |               |            |
| Cases                 | 1       | 7        | 32         | 52          | 71            | 39            | 202        |
| Rate/100,000 (95% CI) | 1 (0,2) | 6 (2,12) | 31 (21,44) | 73 (54,96)  | 151 (118,190) | 241 (171,329) | 22 (19,25) |

Supplemental table 3: Demographics, aetiology and risk factors for incident events in all territories by gender and type

|                                           | Acute Visceral Ischaemia |             |            | Acute Limb Ischaemia |             |             | Critical Limb Ischaemia |             |             |
|-------------------------------------------|--------------------------|-------------|------------|----------------------|-------------|-------------|-------------------------|-------------|-------------|
|                                           | Total                    | Male        | Female     | Total                | Male        | Female      | Total                   | Male        | Female      |
| N (%)                                     | 78 (100%)                | 28 (35.9%)  | 50 (64.1%) | 93 (100%)            | 49 (52.7%)  | 44 (47.3%)  | 202 (100%)              | 109 (54.0%) | 93 (46.0%)  |
| Mean (SD) age, years                      | 79.8 (14.1)              | 74.1 (18.4) | 83.0 (9.9) | 76.3 (11.9)          | 73.6 (11.3) | 79.3 (12.0) | 75.2 (10.9)             | 73.4 (11.2) | 77.3 (10.3) |
| <b>Prior symptomatic vascular disease</b> |                          |             |            |                      |             |             |                         |             |             |
| Coronary Artery Disease                   | 27 (34.6%)               | 9 (32.1%)   | 18 (36.0%) | 27 (29.0%)           | 17 (34.6%)  | 10 (22.7%)  | 77 (38.1%)              | 49 (45.0%)  | 28 (30.1%)  |
| Cardiac failure                           | 26 (33.3%)               | 6 (21.4%)   | 20 (40.0%) | 18 (19.4%)           | 5 (10.2%)   | 13 (29.5%)  | 42 (20.9%)              | 22 (20.4%)  | 20 (21.5%)  |
| Stroke/TIA                                | 15 (19.2%)               | 4 (14.3%)   | 11 (22.0%) | 25 (26.9%)           | 15 (30.6%)  | 10 (22.7%)  | 43 (21.3%)              | 26 (23.9%)  | 17 (18.3%)  |
| Peripheral arterial disease               | 16 (20.5%)               | 4 (14.3%)   | 12 (24.0%) | 39 (41.9%)           | 23 (46.9%)  | 16 (36.4%)  | 143 (70.8%)             | 83 (76.1%)  | 60 (64.5%)  |
| Any                                       | 48 (61.5%)               | 15 (53.6%)  | 33 (66.0%) | 69 (74.2%)           | 34 (69.4%)  | 35 (79.5%)  | 171 (84.7%)             | 98 (89.9%)  | 73 (78.5%)  |
| <b>Risk factors</b>                       |                          |             |            |                      |             |             |                         |             |             |
| Current smoker                            | 13 (16.7%)               | 5 (17.9%)   | 8 (16.0%)  | 21 (22.6%)           | 10 (20.4%)  | 11 (25.0%)  | 58 (28.7%)              | 32 (29.4%)  | 26 (27.9%)  |
| Ever smoked                               | 53 (67.9%)               | 21 (75.0%)  | 32 (64.0%) | 64 (68.8%)           | 37 (75.5%)  | 27 (61.4%)  | 143 (70.8%)             | 90 (82.6%)  | 53 (57.0%)  |
| Hypertension                              | 54 (69.2%)               | 14 (50.0%)  | 40 (80.0%) | 57 (61.3%)           | 25 (51.0%)  | 32 (72.7%)  | 143 (70.8%)             | 74 (67.9%)  | 69 (74.2%)  |
| Diabetes mellitus                         | 9 (11.5%)                | 2 (7.1%)    | 7 (14.0%)  | 12 (12.9%)           | 7 (14.3%)   | 5 (11.4%)   | 89 (44.1%)              | 48 (44.0%)  | 41 (44.1%)  |
| Hyperlipidaemia                           | 36 (46.2%)               | 14 (50.0%)  | 22 (44.0%) | 33 (35.5%)           | 19 (38.8%)  | 14 (31.8%)  | 112 (55.4%)             | 63 (57.8%)  | 49 (52.7%)  |
| Atrial fibrillation                       | 29 (37.2%)               | 10 (35.7%)  | 25 (50.0%) | 36 (38.7%)           | 18 (36.7%)  | 20 (45.5%)  | 42 (20.8%)              | 26 (23.9%)  | 21 (22.6%)  |
| Any                                       | 72 (92.3%)               | 24 (85.7%)  | 48 (96.0%) | 92 (98.9%)           | 49 (100.0%) | 43 (97.7%)  | 197 (97.5%)             | 107 (98.2%) | 90 (96.8%)  |
| <b>Primary aetiology</b>                  |                          |             |            |                      |             |             |                         |             |             |
| Embolic                                   | 43 (55.1%)               | 16 (57.1%)  | 27 (54.0%) | 43 (46.2%)           | 19 (38.8%)  | 24 (54.5%)  | 2 (1.0%)                | 1 (0.9%)    | 1 (1.1%)    |
| Atherosclerotic/ in-situ thrombosis       | 26 (33.3%)               | 7 (25.0%)   | 19 (38.0%) | 22 (23.7%)           | 14 (28.6%)  | 8 (18.2%)   | 146 (72.3%)             | 77 (70.6%)  | 69 (74.2%)  |
| Diabetic microvascular disease            | 0 (0%)                   | 0 (0%)      | 0 (0%)     | 0 (0%)               | 0 (0%)      | 0 (0%)      | 15 (7.4%)               | 12 (11.0%)  | 3 (3.2%)    |
| Multifactorial                            | 9 (11.5%)                | 5 (17.9%)   | 4 (8.0%)   | 19 (20.4%)           | 9 (18.4%)   | 10 (22.7%)  | 38 (18.8%)              | 18 (16.5%)  | 20 (21.5%)  |
| Occluded stent-graft/Other                | 0 (0%)                   | 0 (0%)      | 0 (0%)     | 9 (9.7%)             | 7 (14.3%)   | 2 (4.5%)    | 1 (0.5%)                | 1 (0.9%)    | 0 (0%)      |
| <b>Medications</b>                        |                          |             |            |                      |             |             |                         |             |             |
| Statin                                    | 36 (46.2%)               | 14 (50.0%)  | 22 (44.0%) | 29 (31.2%)           | 17 (34.7%)  | 12 (27.3%)  | 101 (50.0%)             | 62 (56.9%)  | 39 (41.9%)  |
| Antiplatelet                              | 34 (43.6%)               | 11 (39.3%)  | 23 (46.0%) | 42 (45.2%)           | 21 (42.9%)  | 21 (47.7%)  | 127 (62.9%)             | 71 (65.1%)  | 56 (60.2%)  |
| Warfarin                                  | 3 (3.8%)                 | 1 (3.6%)    | 2 (4.0%)   | 9 (9.7%)             | 7 (14.3%)   | 2 (4.5%)    | 17 (8.5%)               | 12 (11.0%)  | 5 (5.4%)    |
| Antihypertensives                         | 57 (73.1%)               | 15 (53.6%)  | 42 (84.0%) | 59 (63.4%)           | 28 (57.1%)  | 31 (70.5%)  | 144 (71.3%)             | 75 (68.8%)  | 69 (74.2%)  |
| Any                                       | 61 (78.2%)               | 19 (67.9%)  | 42 (84.0%) | 70 (75.3%)           | 36 (73.5%)  | 34 (77.3%)  | 175 (86.6%)             | 94 (86.2%)  | 81 (87.1%)  |

Supplemental table 4: Emergency intervention within 48 hours of event

| <b>Emergency Intervention</b> | <b>N (%)</b>  |
|-------------------------------|---------------|
| AVI Events                    | 10/78 (12.8)  |
| Laparotomy                    | 10 (12.8)     |
| Organ resection               | 6 (7.7)       |
| Mesenteric thrombectomy       | 2 (2.6)       |
| Thrombolysis                  | 1 (1.3)       |
| ALI Events                    | 40/93 (43.0)  |
| Thrombectomy                  | 28 (15.4)     |
| Angioplasty / Stenting        | 7 (23.1)      |
| Thrombolysis                  | 2 (2.2)       |
| Emergency Bypass              | 4 (4.3)       |
| Major Amputation              | 4 (4.3)       |
| Minor Amputation              | 1 (1.1)       |
| CLI Events                    | 44/202 (21.8) |
| Angioplasty / Stenting        | 32 (23.1)     |
| Endarterectomy                | 2 (0.9)       |
| Emergency Bypass              | 3 (1.5)       |
| Major Amputation              | 2 (0.9)       |
| Minor Amputation              | 8 (4.0)       |

Supplemental table 5: Age-, sex-, and risk-factor specific raw numbers (2002-2012) for all incident acute peripheral arterial events

| ALI   | Known Hypertension |       |       | None Hypertensive |       |       | Ever Smokers |       |       | None Smokers |       |       | Diabetics |       |       | Non-diabetic |       |       |
|-------|--------------------|-------|-------|-------------------|-------|-------|--------------|-------|-------|--------------|-------|-------|-----------|-------|-------|--------------|-------|-------|
|       | Men                | Women | Total | Men               | Women | Total | Men          | Women | Total | Men          | Women | Total | Men       | Women | Total | Men          | Women | Total |
| < 35  | 0                  | 0     | 0     | 0                 | 0     | 0     | 0            | 0     | 0     | 0            | 0     | 0     | 0         | 0     | 0     | 0            | 0     | 0     |
| 35-44 | 0                  | 0     | 0     | 0                 | 0     | 0     | 0            | 0     | 0     | 0            | 0     | 0     | 0         | 0     | 0     | 0            | 0     | 0     |
| 45-54 | 1                  | 0     | 1     | 3                 | 1     | 4     | 3            | 1     | 4     | 1            | 0     | 1     | 0         | 0     | 0     | 4            | 1     | 5     |
| 55-64 | 5                  | 4     | 9     | 2                 | 2     | 4     | 6            | 6     | 12    | 1            | 0     | 1     | 3         | 2     | 5     | 4            | 4     | 8     |
| 65-74 | 6                  | 6     | 12    | 7                 | 2     | 9     | 10           | 5     | 15    | 3            | 3     | 6     | 1         | 0     | 1     | 12           | 8     | 20    |
| 75-84 | 9                  | 9     | 18    | 10                | 4     | 14    | 14           | 8     | 22    | 5            | 5     | 10    | 3         | 1     | 4     | 16           | 12    | 28    |
| ≥85   | 4                  | 13    | 17    | 2                 | 3     | 5     | 4            | 7     | 11    | 2            | 9     | 11    | 0         | 2     | 2     | 6            | 14    | 20    |
| Total | 25                 | 32    | 57    | 24                | 12    | 36    | 37           | 27    | 64    | 12           | 17    | 29    | 7         | 5     | 12    | 42           | 39    | 81    |
| AVI   |                    |       |       |                   |       |       |              |       |       |              |       |       |           |       |       |              |       |       |
| < 35  | 0                  | 0     | 0     | 2                 | 0     | 2     | 0            | 0     | 0     | 2            | 0     | 2     | 0         | 0     | 0     | 2            | 0     | 2     |
| 35-44 | 0                  | 0     | 0     | 1                 | 0     | 1     | 1            | 0     | 1     | 0            | 0     | 0     | 0         | 0     | 0     | 1            | 0     | 1     |
| 45-54 | 0                  | 0     | 0     | 1                 | 1     | 2     | 1            | 1     | 2     | 0            | 0     | 0     | 0         | 0     | 0     | 1            | 1     | 2     |
| 55-64 | 1                  | 0     | 1     | 3                 | 1     | 4     | 3            | 1     | 4     | 1            | 0     | 1     | 0         | 0     | 0     | 4            | 1     | 5     |
| 65-74 | 2                  | 8     | 10    | 1                 | 0     | 1     | 2            | 7     | 9     | 1            | 1     | 2     | 0         | 1     | 1     | 3            | 7     | 10    |
| 75-84 | 6                  | 10    | 16    | 1                 | 3     | 4     | 5            | 11    | 16    | 2            | 2     | 4     | 1         | 0     | 1     | 6            | 13    | 19    |
| ≥85   | 5                  | 22    | 27    | 5                 | 5     | 10    | 9            | 12    | 21    | 1            | 15    | 16    | 1         | 6     | 7     | 9            | 21    | 30    |
| Total | 14                 | 40    | 54    | 14                | 10    | 24    | 21           | 32    | 53    | 7            | 18    | 25    | 2         | 7     | 9     | 26           | 43    | 69    |
| CLI   |                    |       |       |                   |       |       |              |       |       |              |       |       |           |       |       |              |       |       |
| < 35  | 0                  | 0     | 0     | 0                 | 0     | 0     | 0            | 0     | 0     | 0            | 0     | 0     | 0         | 0     | 0     | 0            | 0     | 0     |
| 35-44 | 0                  | 0     | 0     | 0                 | 1     | 1     | 0            | 1     | 1     | 0            | 0     | 0     | 0         | 1     | 1     | 0            | 0     | 0     |
| 45-54 | 0                  | 1     | 1     | 5                 | 1     | 6     | 5            | 0     | 5     | 0            | 2     | 2     | 1         | 1     | 2     | 4            | 1     | 5     |
| 55-64 | 17                 | 6     | 23    | 5                 | 4     | 9     | 17           | 7     | 24    | 5            | 3     | 8     | 15        | 7     | 22    | 7            | 3     | 10    |
| 65-74 | 21                 | 12    | 33    | 12                | 7     | 19    | 29           | 15    | 44    | 4            | 4     | 8     | 16        | 8     | 24    | 17           | 11    | 28    |
| 75-84 | 26                 | 34    | 60    | 7                 | 4     | 11    | 29           | 22    | 51    | 4            | 16    | 20    | 13        | 15    | 28    | 20           | 23    | 43    |
| ≥85   | 10                 | 16    | 26    | 6                 | 7     | 13    | 10           | 8     | 18    | 6            | 15    | 21    | 3         | 9     | 12    | 13           | 14    | 27    |
| Total | 74                 | 69    | 143   | 35                | 24    | 59    | 90           | 53    | 143   | 19           | 40    | 59    | 48        | 41    | 89    | 61           | 52    | 113   |



Supplemental table 6: Demographics and risk factors for incident events in all territories by Aetiology

|                                                  | <b>Embolic</b> | <b>Atherosclerotic</b> | <b>Multifactorial / Other</b> | <b>Total</b> |
|--------------------------------------------------|----------------|------------------------|-------------------------------|--------------|
| N (%)                                            | 88 (23.6%)     | 194 (52.0%)            | 91 (24.4%)                    | 373 (100%)   |
| Mean (SD) age, years                             | 77.3 (14.1)    | 77.3 (10.8)            | 73.8 (12.0)                   | 76.4 (12.0)  |
| Male                                             | 36 (40.9%)     | 98 (50.5%)             | 52 (57.1%)                    | 186 (49.9%)  |
| <b><i>Prior symptomatic Vascular disease</i></b> |                |                        |                               |              |
| Coronary Artery Disease                          | 26 (29.5%)     | 72 (37.3%)             | 33 (36.3%)                    | 131 (35.2%)  |
| Cardiac failure                                  | 25 (28.4%)     | 40 (20.7%)             | 21 (23.1%)                    | 86 (23.1%)   |
| Stroke/TIA                                       | 19 (21.6%)     | 42 (21.6%)             | 22 (24.2%)                    | 83 (22.3%)   |
| Symptomatic PAD                                  | 17 (19.3%)     | 133 (68.6%)            | 49 (53.8%)                    | 199 (53.4%)  |
| Any                                              | 54 (61.4%)     | 166 (85.6%)            | 68 (74.7%)                    | 288 (77.2%)  |
| <b><i>Risk factors</i></b>                       |                |                        |                               |              |
| Current smoker                                   | 18 (20.5%)     | 53 (27.3%)             | 21 (23.1%)                    | 92 (24.7%)   |
| Ever smoked                                      | 57 (64.8%)     | 140 (72.2%)            | 63 (69.2%)                    | 260 (69.7%)  |
| Hypertension                                     | 57 (64.8%)     | 133 (68.6%)            | 64 (70.3%)                    | 254 (68.1%)  |
| Diabetes mellitus                                | 12 (13.6%)     | 48 (24.7%)             | 50 (54.9%)                    | 110 (29.5%)  |
| Hyperlipidaemia                                  | 30 (34.1%)     | 102 (52.6%)            | 49 (53.8%)                    | 181 (48.5%)  |
| Cardiac failure                                  | 25 (28.4%)     | 40 (20.7%)             | 21 (23.1%)                    | 86 (23.1%)   |
| Atrial fibrillation                              | 48 (54.5%)     | 38 (19.6%)             | 21 (23.1%)                    | 107 (28.7%)  |
| Any                                              | 85 (96.5%)     | 185 (95.4%)            | 91 (100%)                     | 361 (96.8)   |
| <b><i>Medications</i></b>                        |                |                        |                               |              |
| Statin                                           | 29 (33.0%)     | 91 (46.9%)             | 46 (50.5%)                    | 166 (44.5%)  |
| Antiplatelet                                     | 33 (37.5%)     | 115 (59.3%)            | 55 (60.4%)                    | 203 (54.4%)  |
| Warfarin                                         | 5 (5.7%)       | 18 (9.3%)              | 6 (6.6%)                      | 29 (7.8%)    |
| Antihypertensives                                | 58 (65.9%)     | 134 (69.1%)            | 68 (74.7%)                    | 260 (69.7%)  |
| Any                                              | 65 (73.9%)     | 163 (84.0%)            | 78 (85.7%)                    | 306 (82.0%)  |

Supplemental table 7: Changes in disability status for patients with incident acute events stratified by event type

**Total**

|                |       | 6M mRS |           |           |           | Total |
|----------------|-------|--------|-----------|-----------|-----------|-------|
|                |       | 0-2    | 3         | 4-5       | 6         |       |
| Pre-morbid mRS | 0-2   | 98     | <b>55</b> | <b>23</b> | <b>54</b> | 230   |
|                | 3-5   | 1      | 32        | <b>28</b> | <b>78</b> | 139   |
|                | Total | 99     | 87        | 51        | 132       | 369   |

**Acute Visceral Ischaemia**

|                |       | 6M mRS |          |          |           | Total |
|----------------|-------|--------|----------|----------|-----------|-------|
|                |       | 0-2    | 3        | 4-5      | 6         |       |
| Pre-morbid mRS | 0-2   | 10     | <b>3</b> | <b>0</b> | <b>31</b> | 44    |
|                | 3-5   | 0      | 3        | <b>3</b> | <b>28</b> | 34    |
|                | Total | 10     | 6        | 3        | 59        | 78    |

**Acute Limb Ischaemia**

|                |       | 6M mRS |           |          |           | Total |
|----------------|-------|--------|-----------|----------|-----------|-------|
|                |       | 0-2    | 3         | 4-5      | 6         |       |
| Pre-morbid mRS | 0-2   | 28     | <b>12</b> | <b>5</b> | <b>9</b>  | 54    |
|                | 3-5   | 0      | 9         | <b>5</b> | <b>23</b> | 37    |
|                | Total | 28     | 21        | 10       | 32        | 91    |

**Critical Limb Ischaemia**

|                |       | 6M mRS |           |           |           | Total |
|----------------|-------|--------|-----------|-----------|-----------|-------|
|                |       | 0-2    | 3         | 4-5       | 6         |       |
| Pre-morbid mRS | 0-2   | 60     | <b>40</b> | <b>18</b> | <b>14</b> | 132   |
|                | 3-5   | 1      | 20        | <b>20</b> | <b>27</b> | 68    |
|                | Total | 61     | 60        | 38        | 41        | 200   |

Disability status was not available for 4 (1.1%) cases.

Supplemental table 8: Potential risk factors for 30-day amputation/death (organ loss or death for AVI events) and 1-year mortality stratified by event type (univariate analysis)

| STUDY                                           | 30 Day Amputation/ Organ loss/ Death |            |         | 1-year Mortality |            |         |
|-------------------------------------------------|--------------------------------------|------------|---------|------------------|------------|---------|
|                                                 | OR                                   | 95% CI     | P-value | OR               | 95% CI     | P-value |
| <b>ALI (n=93)</b>                               |                                      |            |         |                  |            |         |
| Age                                             | 1.04                                 | 1.00-1.09  | 0.04    | 1.08             | 1.04-1.14  | <0.001  |
| Male Gender                                     | 0.42                                 | 0.17-1.03  | 0.06    | 0.76             | 0.33-1.72  | 0.50    |
| Smoking History                                 | 0.90                                 | 0.33-2.43  | 0.83    | 0.74             | 0.29-1.88  | 0.53    |
| Diabetes                                        | 1.70                                 | 0.49-5.88  | 0.41    | 1.94             | 0.57-6.62  | 0.29    |
| Hypertension                                    | 2.60                                 | 0.98-6.96  | 0.06    | 2.53             | 1.05-6.08  | 0.04    |
| Hyperlipidaemia                                 | 0.94                                 | 0.37-2.36  | 0.89    | 0.74             | 0.31-1.76  | 0.50    |
| Atrial Fibrillation                             | 1.91                                 | 0.79-4.65  | 0.15    | 2.61             | 1.11-6.10  | 0.03    |
| Heart Failure                                   | 2.06                                 | 0.71-5.92  | 0.18    | 4.36             | 1.41-13.55 | 0.01    |
| Prior Coronary Artery Disease                   | 2.26                                 | 0.88-5.78  | 0.09    | 1.52             | 0.62-3.74  | 0.37    |
| Prior Stroke/TIA                                | 2.18                                 | 0.84-5.68  | 0.11    | 1.55             | 0.62-3.89  | 0.35    |
| Prior Peripheral Arterial Disease               | 1.46                                 | 0.60-3.53  | 0.41    | 0.81             | 0.35-1.86  | 0.61    |
| Renal Function (CKD 1-5)*                       | 1.53                                 | 0.89-2.61  | 0.12    | 2.96             | 1.58-5.55  | 0.001   |
| Severity of Ischaemia on Admission <sup>#</sup> | 7.08                                 | 2.21-22.69 | 0.001   | 4.48             | 1.79-11.25 | 0.001   |
| <b>AVI (n=78)</b>                               |                                      |            |         |                  |            |         |
| Age                                             | 1.07                                 | 1.02-1.11  | 0.003   | 1.08             | 1.03-1.13  | 0.001   |
| Male Gender                                     | 1.30                                 | 0.40-4.21  | 0.66    | 0.53             | 0.18-1.51  | 0.23    |
| Smoking History                                 | 0.72                                 | 0.21-2.53  | 0.61    | 1.50             | 0.50-4.48  | 0.47    |
| Diabetes                                        | 2.22                                 | 0.26-19.20 | 0.47    | --               | --         | --      |
| Hypertension                                    | 1.47                                 | 0.46-4.64  | 0.51    | 1.05             | 0.35-3.21  | 0.93    |
| Hyperlipidaemia                                 | 0.82                                 | 0.27-2.48  | 0.73    | 0.94             | 0.33-2.64  | 0.90    |
| Atrial Fibrillation                             | 1.47                                 | 0.47-4.53  | 0.51    | 2.09             | 0.70-6.25  | 0.19    |
| Heart Failure                                   | 4.42                                 | 0.92-21.19 | 0.06    | 13.24            | 1.66-105.8 | 0.02    |
| Prior Coronary Artery Disease                   | 2.74                                 | 0.71-10.61 | 0.15    | 2.40             | 0.71-8.12  | 0.16    |
| Prior Stroke/TIA                                | 1.04                                 | 0.26-4.24  | 0.96    | 0.86             | 0.24-3.10  | 0.82    |
| Prior Peripheral Arterial Disease               | 2.23                                 | 0.46-10.97 | 0.32    | 2.90             | 0.60-14.04 | 0.19    |
| Renal Function (CKD 1-5)*                       | 2.70                                 | 1.37-5.31  | 0.004   | 3.61             | 1.73-7.53  | 0.001   |
| Severity of Ischaemia on Admission <sup>#</sup> | 20.77                                | 2.58-167.3 | 0.004   | 7.25             | 1.91-27.61 | 0.004   |
| <b>CLI (n=202)</b>                              |                                      |            |         |                  |            |         |
| Age                                             | 1.02                                 | 0.98-1.05  | 0.39    | 1.06             | 1.02-1.09  | 0.001   |
| Male Gender                                     | 1.12                                 | 0.52-2.39  | 0.78    | 0.69             | 0.38-1.27  | 0.24    |
| Smoking History                                 | 1.00                                 | 0.43-2.32  | 1.00    | 0.73             | 0.38-1.42  | 0.35    |
| Diabetes                                        | 1.04                                 | 0.48-2.25  | 0.91    | 0.77             | 0.41-1.43  | 0.40    |
| Hypertension                                    | 0.75                                 | 0.34-1.68  | 0.48    | 1.68             | 0.83-3.41  | 0.15    |
| Hyperlipidaemia                                 | 0.76                                 | 0.36-1.62  | 0.48    | 0.76             | 0.41-1.39  | 0.37    |
| Atrial Fibrillation                             | 1.36                                 | 0.58-3.18  | 0.48    | 1.53             | 0.76-3.05  | 0.23    |
| Heart Failure                                   | 1.70                                 | 0.72-4.03  | 0.23    | 3.76             | 1.85-7.65  | <0.001  |
| Prior Coronary Artery Disease                   | 1.54                                 | 0.72-3.29  | 0.27    | 1.42             | 0.77-2.64  | 0.26    |
| Prior Stroke/TIA                                | 0.83                                 | 0.32-2.17  | 0.70    | 1.22             | 0.59-5.53  | 0.59    |
| Prior Peripheral Arterial Disease               | 1.48                                 | 0.60-3.66  | 0.39    | 0.71             | 0.36-1.37  | 0.30    |
| Renal Function (CKD 1-5)*                       | 1.54                                 | 1.03-2.29  | 0.03    | 1.85             | 1.30-2.62  | 0.001   |
| Severity of Ischaemia on Admission <sup>#</sup> | --                                   | --         | --      | 4.19             | 1.56-11.25 | 0.004   |

Unadjusted odds ratios provided

\* CKD = Chronic Kidney disease (staging 1-5). Based on calculated eGFR. <http://www.renal.org>

<sup>#</sup> For AVI this is measured by the presence/absence of lactic acidosis; CLI this is tissue loss versus rest pain alone; and for ALI this is Rutherford grading I / IIA versus IIB / III

Supplemental table 9: Sex-specific incidence and outcome rates for incident peripheral arterial events by severity grading

|                                                 | Men         |                          |                                      | Women      |                          |                                      | Total       |                          |                                      |
|-------------------------------------------------|-------------|--------------------------|--------------------------------------|------------|--------------------------|--------------------------------------|-------------|--------------------------|--------------------------------------|
|                                                 | Cases       | Rate/100,000<br>(95% CI) | Amputation-free Survival<br>- 30 day | Cases      | Rate/100,000<br>(95% CI) | Amputation-free Survival<br>- 30 day | Cases       | Rate/100,000<br>(95% CI) | Amputation-free Survival<br>- 30 day |
| <b>Acute Limb Ischaemia</b>                     |             |                          |                                      |            |                          |                                      |             |                          |                                      |
| All                                             | 49 (52.7%)  | 10 (8-14)                | 38 (77.6%)                           | 44 (47.3%) | 10 (7-13)                | 26 (59.1%)                           | 93 (100%)   | 10 (8-12)                | 64 (68.8%)                           |
| Viable (Rutherford I)                           | 19 (70.4%)  | 4 (2-6)                  | 19 (100.0%)                          | 8 (29.6%)  | 2 (1-3)                  | 8 (100.0%)                           | 27 (29.0%)  | 3 (2-4)                  | 27 (100.0%)                          |
| Threatened Marginal (IIA)                       | 8 (47.9%)   | 2 (1-3)                  | 7 (87.5%)                            | 9 (52.9%)  | 2 (1-4)                  | 6 (66.7%)                            | 17 (18.3%)  | 2 (1-3)                  | 13 (76.5%)                           |
| Threatened Immediate (IIB)                      | 13 (46.4%)  | 3 (1-5)                  | 11 (84.6%)                           | 15 (53.6%) | 3 (2-5)                  | 12 (80.0%)                           | 28 (30.1%)  | 3 (2-4)                  | 23 (82.1%)                           |
| Irreversible (III)                              | 9 (42.9%)   | 2 (1-4)                  | 1 (11.1%)                            | 12 (57.1%) | 3 (1-5)                  | 0 (0.0%)                             | 21 (22.6%)  | 2 (1-3)                  | 1 (4.8%)                             |
| <b>Critical Limb Ischaemia</b>                  |             |                          |                                      |            |                          |                                      |             |                          |                                      |
| All                                             | 109 (54.0%) | 23 (19-28)               | 92 (84.4%)                           | 93 (46.0%) | 21 (17-25)               | 79 (84.9%)                           | 202 (100%)  | 22 (19-25)               | 171 (84.7%)                          |
| Rest Pain Only<br>(Fontaine III/ Rutherford 4)  | 26 (60.5%)  | 6 (4-8)                  | 26 (100.0%)                          | 17 (39.5%) | 4 (2-6)                  | 17 (100.0%)                          | 43 (21.3%)  | 5 (3-6)                  | 43 (100.0%)                          |
| Tissue Loss minor<br>(Fontaine IV/Rutherford 5) | 78 (53.1%)  | 17 (13-21)               | 65 (83.3%)                           | 69 (46.9%) | 15 (12-20)               | 58 (84.1%)                           | 147 (72.8%) | 16 (14-19)               | 123 (83.7%)                          |
| Tissue Loss Major<br>(Fontaine IV/Rutherford 6) | 5 (41.7%)   | 1 (0-2)                  | 1 (20.0%)                            | 7 (58.3%)  | 2 (1-3)                  | 4 (57.1%)                            | 12 (5.9%)   | 1 (1-2)                  | 5 (41.7%)                            |
| <b>Acute Visceral Ischaemia</b>                 |             |                          |                                      |            |                          |                                      |             |                          |                                      |
| All                                             | 28 (35.9%)  | 6 (4-9)                  | 5 (17.9%)                            | 50 (64.1%) | 11 (8-15)                | 11 (22.0%)                           | 78 (100%)   | 8 (7-11)                 | 16 (80.5%)                           |
| No Lactic Acidosis                              | 13 (46.4%)  | 3 (1-5)                  | 4 (30.8%)                            | 28 (56.0%) | 6 (4-9)                  | 11 (39.3%)                           | 41 (52.6%)  | 4 (3-6)                  | 15 (36.6%)                           |
| Lactic Acidosis                                 | 15 (53.6%)  | 3 (2-5)                  | 1 (6.7%)                             | 22 (44.0%) | 5 (3-7)                  | 0 (0.0%)                             | 37 (47.4%)  | 4 (3-6)                  | 1 (2.7%)                             |

Supplemental table 10: Severity of disease and related mortality by age and event type

|                                      | < 75 yrs   | 75-84 yrs  | ≥ 85 yrs   | P      | Total       |
|--------------------------------------|------------|------------|------------|--------|-------------|
| AVI Events                           | 21 (26.9%) | 20 (25.6%) | 37 (47.4%) |        | 78 (100%)   |
| Lactic Acidosis*                     | 5 (23.8%)  | 11 (55.0%) | 21 (56.8%) | 0.03   | 37 (47.4%)  |
| 1-year Death                         | 11 (52.4%) | 14 (70.0%) | 34 (91.9%) | 0.001  | 59 (75.6%)  |
| ALI Events                           | 39 (41.9%) | 32 (34.4%) | 22 (23.7%) |        | 93 (100%)   |
| Immediately threatened / non-viable* | 15 (38.5%) | 20 (62.5%) | 14 (63.6%) | 0.04   | 49 (52.7%)  |
| 1-year limb loss                     | 6 (15.4%)  | 4 (12.5%)  | 0 (0.0%)   | 0.08   | 10 (10.8%)  |
| 1-year Death                         | 9 (23.1%)  | 15 (46.9%) | 17 (77.3%) | <0.001 | 41 (44.1%)  |
| CLI Events                           | 92 (45.5%) | 71 (35.1%) | 39 (19.3%) |        | 202 (100%)  |
| Tissue loss*                         | 66 (71.7%) | 57 (80.3%) | 34 (87.2)  | 0.04   | 157 (77.7%) |
| 1-year limb loss                     | 19 (20.7%) | 16 (22.5%) | 5 (12.8%)  | 0.42   | 40 (19.8%)  |
| 1-year Death                         | 17 (18.5%) | 24 (33.8%) | 18 (46.2%) | 0.001  | 59 (29.2%)  |

\*Indicates severity of disease on admission

## **Figure Legends**

Supplemental figure 1. Age- and sex-specific prevalence of known hypertension, smoking history, and diabetes mellitus in the incident peripheral arterial event group and total OXVASC population (2002-2012).

Supplemental figure 2: 30-day survival for incident acute peripheral arterial events by subtype with numbers at risk tabled below.

Supplemental figure 3. One-year mortality for incident acute vascular disease by subtype of acute vascular event.

Supplemental figure 1.

**Event Group**

**OXVASC Population**

**HYPERTENSION**

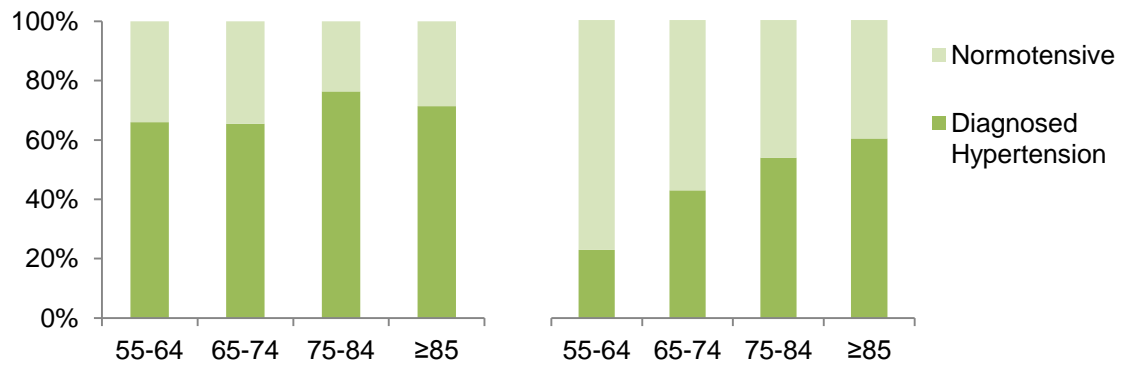

**SMOKING HISTORY**

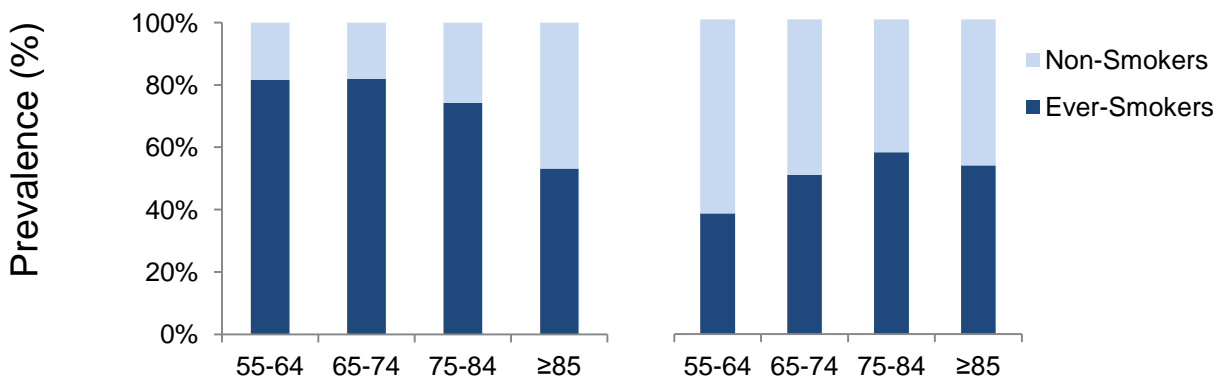

**DIABETES MELLITUS**

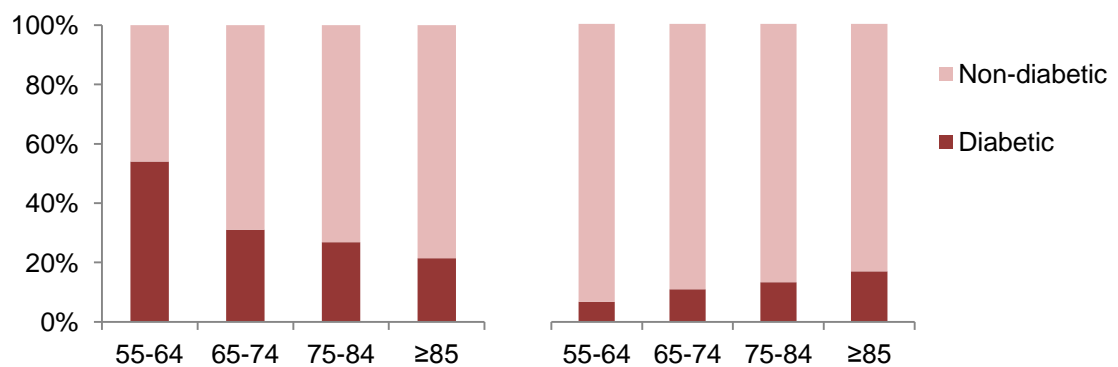

Supplemental figure 2

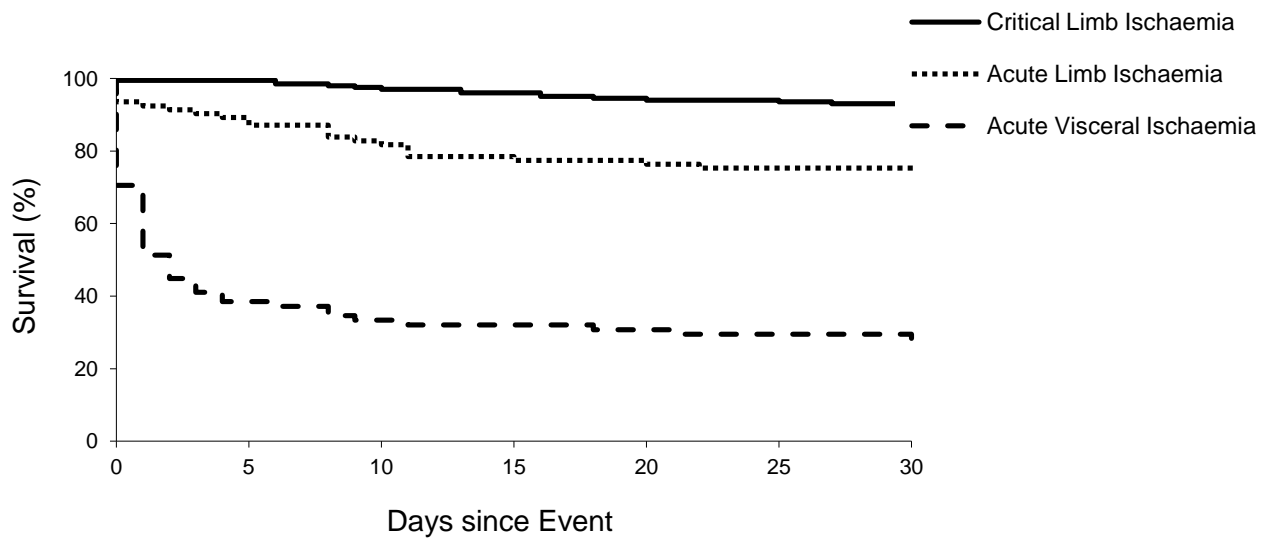

Numbers At Risk

|     |     |     |     |     |     |     |     |
|-----|-----|-----|-----|-----|-----|-----|-----|
| CLI | 202 | 202 | 198 | 196 | 191 | 190 | 189 |
| ALI | 93  | 84  | 78  | 73  | 72  | 71  | 71  |
| AVI | 78  | 32  | 27  | 26  | 25  | 24  | 24  |



Supplemental figure 3

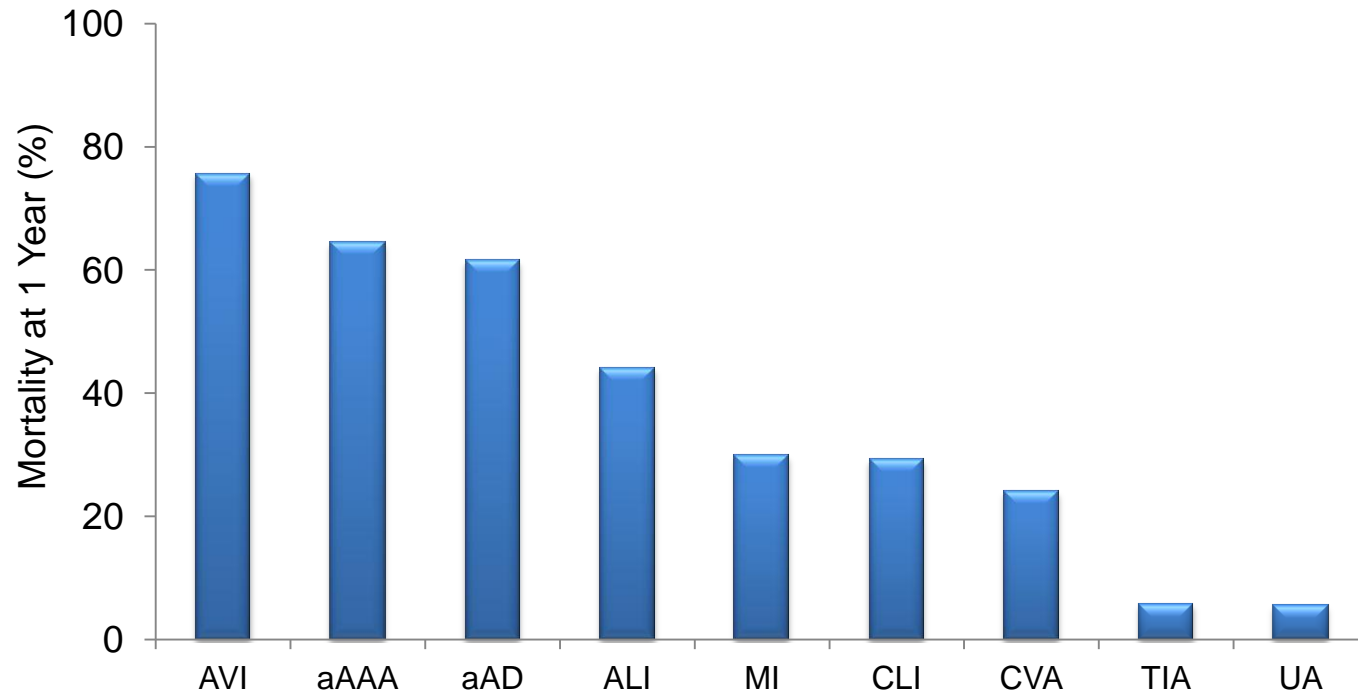

AVI=acute visceral ischaemia, aAAA=acute abdominal aortic aneurysm, aAD=acute aortic dissection, ALI=acute limb ischaemia, MI= myocardial infarction, CLI=critical limb ischaemia, CVA=cerebrovascular accident (ischaemic stroke), TIA=transient ischaemic attack, UA=unstable angina
